# Supplementary material for: Effect of the Sodium Polyacrylate on the Magnetite Nanoparticles Produced by Green Chemistry Routes: Applicability in Forward Osmosis
Source: Preprints.org preprint supplement (doi:10.20944/preprints201806.0024.v1), 2018-06-04
Supplement: Supplementary file 1 [file TABLE_S1.docx]

| 298 K | **DSHERRER**  **nm** | **Ms (Fe)**  **Am2/KgFe** | **γ (Fe)**  **Am2/KgFeT** | **Pure samples as reference** | |
| --- | --- | --- | --- | --- | --- |
| **Size [nm]** | **Ms(Fe)**  **Am2/KgFe** |
| OP10 | 34 | 120.0 ± 0.4 | 3170 ± 178 | *35* | 120 |
| OP20 | 27 | 117.8 ± 0.3 | 3094 ± 157 | *25* | 114 |
| OP30 | 11 | **63.8** ± 0.2 | 1205 ± 197 | *10* | **86** |
| OP50 | 5 | 63.8 ± 0.2 | 636 ± 70 | *5* | 56 |

TABLE 1 (Supplementary Information)

Comparison of the saturation magnetization per Kg of iron present in the composite samples of Fe3O4/PAANa obtained by oxidative precipitation with the reference samples of pure magnetite/maghemite of similar size
